# Supplementary material for: Socioeconomic bias in influenza surveillance
Source: PubMed Central journal article supplement (PMC7347107; doi:10.1371/journal.pcbi.1007941), 2020-07-09
Supplement: pcbi.1007941.s005.pdf [file pcbi.1007941.s005.pdf]

# Supplemental Text 5:

## Socioeconomic bias in influenza surveillance

Samuel V. Scarpino<sup>1,2</sup>, James G. Scott<sup>3</sup>, Rosalind M. Eggo<sup>4</sup>, Bruce Clements<sup>5</sup>,  
Nedialko B. Dimitrov<sup>3</sup>, and Lauren Ancel Meyers<sup>3,6,\*</sup>

<sup>1</sup>Northeastern University, Boston, MA, 02115, USA

<sup>2</sup>ISI Foundation, 10126 Turin, Italy

<sup>3</sup>The University of Texas at Austin, Austin, TX, USA

<sup>4</sup>London School of Hygiene and Tropical Medicine, London, UK

<sup>5</sup>Pediatric Healthcare Connection, Austin, TX, USA

<sup>6</sup>Santa Fe Institute, Santa Fe, New Mexico, USA

\*address general correspondence to laurenmeyers@austin.utexas.edu

### Models fit using ZIP Code level ILINet data.

| Surveillance Data Sources | Poverty Quartile                 |              |              |                                   | Aggregate |
|---------------------------|----------------------------------|--------------|--------------|-----------------------------------|-----------|
|                           | 1st quartile<br>(lowest poverty) | 2nd quartile | 3rd quartile | 4th quartile<br>(highest poverty) |           |
| ILI                       | 1.63                             | 1.87         | 2.80         | 3.14                              | 2.11      |
| Biosense                  | 1.63                             | 2.12         | 2.83         | 3.99                              | 2.52      |
| GFT                       | 1.28                             | 1.70         | 2.78         | 3.43                              | 2.00      |
| ILI + Biosense            | 1.72                             | 1.77         | 2.42         | 3.41                              | 1.94      |
| ILI + GFT                 | 1.47                             | 1.71         | 2.42         | 2.59                              | 1.66      |
| Biosense + GFT            | 1.34                             | 1.97         | 2.75         | 3.80                              | 2.35      |
| ILI + Biosense + GFT      | 1.34                             | 1.70         | 2.27         | 3.31                              | 1.56      |

**Table 1.** Out-of-sample (leave-one-out) root mean-squared error (ORMSE) for each Poisson generalized additive model with ZIP Code level data from ILINet as a possible predictor. Values are normalized by the population size of each ZIP Code quartile and then multiplied by  $10^6$  to obtain ORMSE per one million residents. The rightmost column gives aggregate ORMSE across all ZIP Codes in the six county area. The quartiles contained: [0-8) (1st quartile), [8-12) (2nd quartile), [12-21) (3rd quartile), and  $> 21$  (4th quartile) percent of residents below the poverty line.
